# Supplementary material for: Persistence of OXA-48-producing ST-22 Citrobacter freundii in patients and the hospital environment, Paris, France, 2016 to 2022
Source: PubMed Central journal article supplement (PMC11650478; doi:10.2807/1560-7917.es.2024.29.49.2400262), 2024-12-05
Supplement: 24-00262_JOLIVET_Supplementary_Table.pdf [file 24-00262_JOLIVET_Supplementary_Table.pdf]

This supplementary material is hosted by *Eurosurveillance* as supporting information alongside the article “Persistence of OXA-48-producing ST-22 *Citrobacter freundii* in patients and the hospital environment, Paris, France, 2016 to 2022”, on behalf of the authors, who remain responsible for the accuracy and appropriateness of the content. The same standards for ethics, copyright, attributions and permissions as for the article apply. Supplements are not edited by *Eurosurveillance* and the journal is not responsible for the maintenance of any links or email addresses provided therein.

**Supplementary Table.** Characteristics of OXA-48-producing *Citrobacter freundii* sequence type ST-22 strains, 2016-2022 (n = 53)

| Strain reference | BioSample Accession Number | Ward                | Building | Month/year of specimen collection | Infection/colonisation or environment | Delay from admission | Acquired or imported case | Carbapenemase  |
|------------------|----------------------------|---------------------|----------|-----------------------------------|---------------------------------------|----------------------|---------------------------|----------------|
| 124G3            | SAMN39855129               | Haematology         | A        | May-16                            | Colonisation                          | 37                   | Acquired                  | OXA-48         |
| 124F3            | SAMN39855128               | Haematology         | A        | July-16                           | Infection                             | 25                   | Acquired                  | OXA-48         |
| 137I5            | SAMN39855131               | Haematology         | A        | December-16                       | Infection                             | 63                   | Acquired                  | OXA-48         |
| 137I7            | SAMN39855132               | Internal medicine   | B        | January-17                        | Infection                             | 0                    | Imported                  | OXA-48         |
| 137I2            | SAMN39855130               | Haematology         | C        | March-17                          | Infection                             | 50                   | Acquired                  | OXA-48         |
| 149I8            | SAMN39855133               | Haematology         | C        | June-17                           | Colonisation                          | 6                    | Acquired                  | OXA-48         |
| 149I9            | SAMN39855134               | Haematology         | C        | July-17                           | Colonisation                          | 14                   | Acquired                  | OXA-48         |
| 149J4            | SAMN39855135               | Haematology         | A        | August-17                         | Colonisation                          | 33                   | Acquired                  | OXA-48 + NDM-1 |
| 149J6            | SAMN39855137               | Haematology         | C        | August-17                         | Colonisation                          | 11                   | Acquired                  | OXA-48         |
| 149J5            | SAMN39855136               | Haematology         | C        | August-17                         | Infection                             | 32                   | Acquired                  | OXA-48         |
| 164E10           | SAMN39855138               | Haematology         | A        | December-17                       | Colonisation                          | 31                   | Acquired                  | OXA-48         |
| 164F1            | SAMN39855139               | Haematology         | A        | January-18                        | Colonisation                          | 14                   | Acquired                  | OXA-48         |
| 164F5            | SAMN39855141               | Haematology         | C        | February-18                       | Colonisation                          | 28                   | Acquired                  | OXA-48         |
| 164F4            | SAMN39855140               | Haematology         | A        | February-18                       | Infection                             | 13                   | Acquired                  | OXA-48         |
| 179H4            | SAMN39855142               | Haematology         | C        | April-18                          | Colonisation                          | 5                    | Acquired                  | OXA-48         |
| 179H5            | SAMN39855143               | Haematology         | C        | June-18                           | Infection                             | 42                   | Acquired                  | OXA-48         |
| 179H9            | SAMN39855145               | Haematology         | C        | June-18                           | Environment                           | -                    | -                         | OXA-48         |
| 179H10           | SAMN39855146               | Haematology         | C        | June-18                           | Environment                           | -                    | -                         | OXA-48         |
| 179H7            | SAMN39855144               | Haematology         | A        | June-18                           | Colonisation                          | 17                   | Acquired                  | OXA-48         |
| 179I3            | SAMN39855147               | Haematology         | A        | July-18                           | Environment                           | -                    | -                         | OXA-48         |
| 179I5            | SAMN39855149               | Infectious Diseases | B        | July-18                           | Environment                           | -                    | -                         | OXA-48         |
| 179I4            | SAMN39855148               | Haematology         | A        | July-18                           | Environment                           | -                    | -                         | OXA-48         |
| 241G3            | SAMN39855150               | Haematology         | C        | November-19                       | Colonisation                          | 6                    | Acquired                  | OXA-48         |
| 327B7            | SAMN39855178               | Haematology         | C        | November-19                       | Environment                           | -                    | -                         | OXA-48         |
| 327B6            | SAMN39855177               | Haematology         | C        | December-19                       | Environment                           | -                    | -                         | OXA-48         |
| 327B5            | SAMN39855176               | Hepatology          | C        | January-20                        | Environment                           | -                    | -                         | OXA-48         |
| 276F3            | SAMN39855151               | Digestive surgery   | C        | September-20                      | Infection                             | 1                    | Imported                  | OXA-48         |
| 316I6            | SAMN39855161               | Digestive surgery   | C        | November-20                       | Colonisation                          | 16                   | Acquired                  | OXA-48         |
| 279B9            | SAMN39855153               | Infectious Diseases | B        | January-21                        | Colonisation                          | 29                   | Acquired                  | OXA-48         |
| 279B7            | SAMN39855152               | Infectious Diseases | B        | January-21                        | Colonisation                          | 8                    | Acquired                  | OXA-48         |
| 327B4            | SAMN39855175               | Infectious Diseases | B        | January-21                        | Environment                           | -                    | -                         | OXA-48         |
| 282B3            | SAMN39855154               | Infectious Diseases | B        | February-21                       | Colonisation                          | 14                   | Acquired                  | OXA-48         |
| 282B4            | SAMN39855155               | Hepatology          | C        | February-21                       | Infection                             | 6                    | Acquired                  | OXA-48         |
| 327B2            | SAMN39855174               | Infectious Diseases | B        | February-21                       | Environment                           | -                    | -                         | OXA-48         |

|        |              |                              |   |              |              |    |          |        |
|--------|--------------|------------------------------|---|--------------|--------------|----|----------|--------|
| 285E1  | SAMN39855156 | Digestive surgery            | C | April-21     | Infection    | 11 | Acquired | OXA-48 |
| 287E1  | SAMN39855157 | Digestive surgery            | C | May-21       | Colonisation | 23 | Acquired | OXA-48 |
| 295A5  | SAMN39855158 | Infectious Diseases          | B | August-21    | Colonisation | 13 | Acquired | OXA-48 |
| 305J1  | SAMN39855160 | Infectious Diseases          | B | September-21 | Colonisation | 4  | Acquired | OXA-48 |
| 327A10 | SAMN39855172 | Infectious Diseases          | B | September-21 | Environment  | -  | -        | OXA-48 |
| 327B1  | SAMN39855173 | Infectious Diseases          | B | September-21 | Environment  | -  | -        | OXA-48 |
| 305I9  | SAMN39855159 | Infectious Diseases          | B | September-21 | Colonisation | 11 | Acquired | OXA-48 |
| 327A9  | SAMN39855171 | Infectious Diseases          | B | October-21   | Environment  | -  | -        | OXA-48 |
| 324D7  | SAMN39855163 | Haematology                  | C | March-22     | Colonisation | 0  | Imported | OXA-48 |
| 322F10 | SAMN39855162 | Infectious Diseases          | B | April-22     | Colonisation | 35 | Acquired | OXA-48 |
| 327A3  | SAMN39855166 | Infectious Diseases          | B | April-22     | Environment  | -  | -        | OXA-48 |
| 327A4  | SAMN39855167 | Infectious Diseases          | B | April-22     | Environment  | -  | -        | OXA-48 |
| 327A5  | SAMN39855168 | Infectious Diseases          | B | April-22     | Environment  | -  | -        | OXA-48 |
| 327A6  | SAMN39855169 | Infectious Diseases          | B | April-22     | Environment  | -  | -        | OXA-48 |
| 327A7  | SAMN39855170 | Infectious Diseases          | B | April-22     | Environment  | -  | -        | OXA-48 |
| 327A1  | SAMN39855165 | Infectious Diseases          | B | April-22     | Environment  | -  | -        | OXA-48 |
| 326J10 | SAMN39855164 | Internal medicine            | B | April-22     | Environment  | -  | -        | OXA-48 |
| 335J5  | SAMN39855180 | Surgical intensive care unit | C | June-22      | Colonisation | 11 | Acquired | OXA-48 |
| 335I5  | SAMN39855179 | Orthopaedic surgery          | C | July-22      | Colonisation | 27 | Acquired | OXA-48 |
